# Supplementary material for: High Sucrose Diet-Induced Subunit I Tyrosine 304 Phosphorylation of Cytochrome c Oxidase Leads to Liver Mitochondrial Respiratory Dysfunction in the Cohen Diabetic Rat Model
Source: MDPI journal article supplement (doi:10.3390/antiox13010019), 2023-12-21
Supplement: s1 [file s1]

## Supplementary Figures

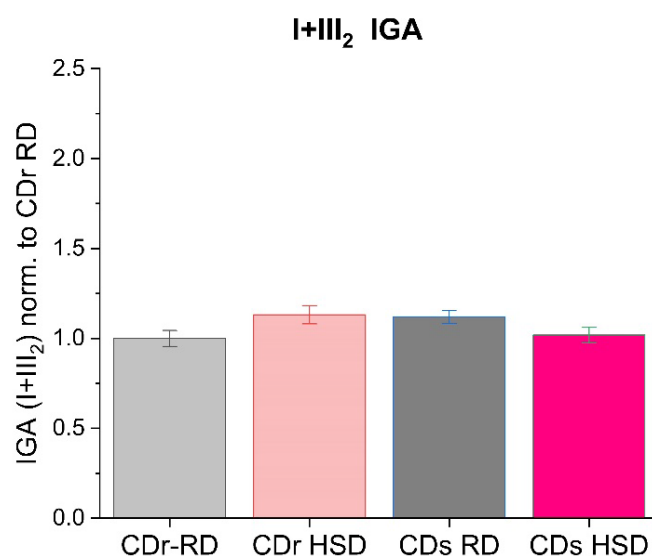

**Figure S1.** Complex I-related in-gel activity is unaltered in the I+III<sub>2</sub> supercomplex. Data are reported as % of CDr RD set to 100% and derived from three independent experiments using mitochondria from three distinct Cohen diabetes-resistant (CDr) and Cohen diabetes-sensitive (CDs) rat livers. RD, regular diet; HSD, high sucrose low copper diet.

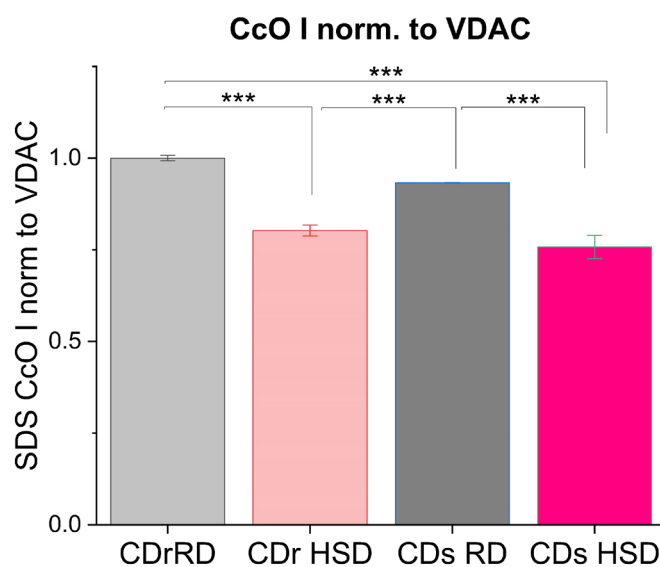

**Figure S2.** Decrease in CcO subunit I content in HSD strains. Quantitation of CcO subunit I normalized to total VDAC. Data are reported as % of CDr RD set to 100% and derived from three independent experiments using mitochondria from three distinct Cohen diabetes-resistant (CDr) and Cohen diabetes-sensitive (CDs) rat livers. RD, regular diet; HSD, high sucrose low copper diet; \*\*\*,  $p < 0.001$ .

## Supplementary Tables

**Table S1.** Summary of Two-Way ANOVA results of Figure 3.

|                | IGA Band                            | Strain Effect | Diet Effect                | Interaction Effect        |
|----------------|-------------------------------------|---------------|----------------------------|---------------------------|
| Complex IV IGA | IV                                  | ns.           | $F= 44.941$<br>$p < 0.001$ | $F= 10.267$<br>$p= 0.003$ |
|                | IV <sub>2</sub>                     | ns.           | $F= 26.597$<br>$p < 0.001$ | $F= 10.521$<br>$p= 0.001$ |
|                | III <sub>2</sub> +IV                | ns.           | $F= 18.438$<br>$P < 0.001$ | $F= 7.365$<br>$p= 0.001$  |
|                | I                                   | ns.           | $F= 11.736$<br>$p < 0.003$ | ns.                       |
| Complex I IGA  | I+III <sub>2</sub>                  | ns.           | ns.                        | $F= 7.031$<br>$p=0.02$    |
|                | I+III <sub>2</sub> +IV              | ns.           | ns.                        | $F= 21.21$<br>$p < 0.001$ |
|                | I+III <sub>2</sub> +IV <sub>n</sub> | ns.           | $F= 16.640$<br>$p < 0.001$ | ns.                       |
|                |                                     |               |                            |                           |

*ns: not significant*
